# Supplementary material for: Selection of Autochthonous Yeasts Isolated from the Intestinal Tracts of Cobia Fish (Rachycentron canadum) with Probiotic Potential
Source: MDPI journal article supplement (doi:10.3390/jof9020274), 2023-02-18
Supplement: s1 [file s1]

Table S4. Survival of cobia larvae in safety and protection experiments.

|               | Safety (24 h)                          | Protective action against a<br>hyposaline stress (8 h) |
|---------------|----------------------------------------|--------------------------------------------------------|
| Yeast strain  | mean $\pm$ se                          | mean $\pm$ se                                          |
| Ch-C01        | 16.67 $\pm$ 2.32 b                     | 33.33 $\pm$ 3.33 a                                     |
| <b>Dh-C10</b> | <b>54.00 <math>\pm</math> 7.21 bc</b>  | <b>46.67 <math>\pm</math> 3.33 b</b>                   |
| <b>Ch-C27</b> | <b>35.33 <math>\pm</math> 2.67 abc</b> | <b>56.67 <math>\pm</math> 3.33 a</b>                   |
| <b>Dh-C28</b> | <b>49.33 <math>\pm</math> 4.81 bc</b>  | <b>56.67 <math>\pm</math> 3.33 c</b>                   |
| Cp-C31        | 18.00 $\pm$ 4.00 c                     | 0.00 $\pm$ 0.00 a                                      |
| Cp-C32        | 12.00 $\pm$ 6.00 bc                    | 53.33 $\pm$ 6.67 b                                     |
| Cp-C46        | 18.00 $\pm$ 1.15 a                     | 33.33 $\pm$ 6.67 ab                                    |
| Ccontrol      | 34.00 $\pm$ 5.03 ab                    | 53.33 $\pm$ 6.67 a                                     |

data: mean  $\pm$  standar error

test: Dunett test

**data in bold correspond to the selected yeast strains**
