# Supplementary material for: Selection of Autochthonous Yeasts Isolated from the Intestinal Tracts of Cobia Fish (Rachycentron canadum) with Probiotic Potential
Source: MDPI journal article supplement (doi:10.3390/jof9020274), 2023-02-18
Supplement: s1 [file s1]

Table S1. Yeast isolates (n=39) from cobia fish (n=37; fish code).

| Samples |        |           |            |      |                             |      |        |                |                   |             | Isolates     |                 |       |                          |              |                                                                                       |                                                                                       |
|---------|--------|-----------|------------|------|-----------------------------|------|--------|----------------|-------------------|-------------|--------------|-----------------|-------|--------------------------|--------------|---------------------------------------------------------------------------------------|---------------------------------------------------------------------------------------|
| N°      | Origin | Fish code | Weight (g) | Sex  | Fish                        | Feed | T (°C) | Salinity (ppt) | Sample weight (g) | Sample code | Isolate code | Cell morphology | Type  | Species                  | RAPD profile | Colonies in petri plate 48 hours                                                      | Cell morphology                                                                       |
| 1       | C      | C34       | 4780.0     | male | <i>Rachycentron canadum</i> | FFP  | 27     | 35             | 0.35              | 34          | <b>C01</b>   | oval            | yeast | <i>Candida haemuloni</i> | B            |    |    |
| 2       | C      | C20       | 511.2      | IND  | <i>Rachycentron canadum</i> | FFP  | 27     | 35             | 0.55              | 20          | <b>C03</b>   | round           | yeast | <i>Debaryomyces</i> sp.  | K            |    |    |
| 3       | C      | C20       | 511.2      | IND  | <i>Rachycentron canadum</i> | FFP  | 27     | 35             | 0.55              | 20          | <b>C04</b>   | round           | yeast | <i>Debaryomyces</i> sp.  | N            |   |   |
| 4       | C      | C23       | 498.6      | IND  | <i>Rachycentron canadum</i> | FFP  | 27     | 35             | 0.25              | 23          | <b>C10</b>   | round           | yeast | <i>Debaryomyces</i> sp.  | M            |  |  |

|   |   |     |        |        |                             |     |    |    |      |    |            |           |       |                          |   |                                                                                       |                                                                                       |
|---|---|-----|--------|--------|-----------------------------|-----|----|----|------|----|------------|-----------|-------|--------------------------|---|---------------------------------------------------------------------------------------|---------------------------------------------------------------------------------------|
| 5 | C | C27 | 366.8  | IND    | <i>Rachycentron canadum</i> | FF  | 27 | 35 | 0.73 | 27 | <b>C12</b> | round     | yeast | <i>Debaryomyces</i> sp.  | M |    |    |
| 6 | C | C32 | 5200.0 | female | <i>Rachycentron canadum</i> | FFP | 27 | 35 | 0.29 | 32 | <b>C13</b> | oval      | yeast | <i>Candida haemuloni</i> | B |    |    |
| 7 | C | C32 | 5200.0 | female | <i>Rachycentron canadum</i> | FFP | 27 | 35 | 0.29 | 32 | <b>C16</b> | round     | yeast | <i>Debaryomyces</i> sp.  | L |    |    |
| 8 | C | C32 | 5200.0 | female | <i>Rachycentron canadum</i> | FFP | 27 | 35 | 0.29 | 32 | <b>C17</b> | round     | yeast | <i>Debaryomyces</i> sp.  | L |   |   |
| 9 | C | C28 | 370.6  | IND    | <i>Rachycentron canadum</i> | FF  | 27 | 35 | 0.59 | 28 | <b>C19</b> | round big | yeast | <i>Debaryomyces</i> sp.  | J |  |  |

|    |   |     |       |        |                             |     |      |    |      |     |            |       |       |                          |   |                                                                                       |                                                                                       |
|----|---|-----|-------|--------|-----------------------------|-----|------|----|------|-----|------------|-------|-------|--------------------------|---|---------------------------------------------------------------------------------------|---------------------------------------------------------------------------------------|
| 10 | C | C24 | 489.2 | IND    | <i>Rachycentron canadum</i> | FFP | 27   | 35 | 0.17 | 24  | <b>C21</b> | round | yeast | <i>Debaryomyces</i> sp.  | K | 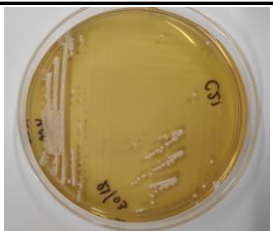   |    |
| 11 | C | C27 | 366.8 | IND    | <i>Rachycentron canadum</i> | FF  | 27   | 35 | 0.73 | 27  | <b>C22</b> | oval  | yeast | <i>Candida haemuloni</i> | B |    |    |
| 12 | E | C5  | 871.8 | female | <i>Rachycentron canadum</i> | FFP | 26.6 | 29 | 0.22 | 5.2 | <b>C24</b> | round | yeast | <i>Debaryomyces</i> sp.  | L |    |    |
| 13 | E | C1  | 801.8 | male   | <i>Rachycentron canadum</i> | FFP | 26.6 | 29 | 0.17 | 1.2 | <b>C25</b> | round | yeast | <i>Debaryomyces</i> sp.  | L |   |   |
| 14 | E | C1  | 801.8 | male   | <i>Rachycentron canadum</i> | FFP | 26.6 | 29 | 0.17 | 1.2 | <b>C26</b> | round | yeast | <i>Debaryomyces</i> sp.  | N |  |  |

|    |   |    |        |        |                             |     |      |    |      |     |            |           |       |                             |   |                                                                                       |                                                                                       |
|----|---|----|--------|--------|-----------------------------|-----|------|----|------|-----|------------|-----------|-------|-----------------------------|---|---------------------------------------------------------------------------------------|---------------------------------------------------------------------------------------|
| 15 | E | C5 | 871.8  | female | <i>Rachycentron canadum</i> | FFP | 26.6 | 29 | 0.22 | 5.2 | <b>C27</b> | oval      | yeast | <i>Candida haemuloni</i>    | C |    |    |
| 16 | E | C5 | 871.8  | female | <i>Rachycentron canadum</i> | FFP | 26.6 | 29 | 0.22 | 5.2 | <b>C28</b> | round     | yeast | <i>Debaryomyces</i> sp.     | I |    |    |
| 17 | E | C2 | 1447.8 | male   | <i>Rachycentron canadum</i> | FFP | 26.6 | 29 | 0.21 | 2.2 | <b>C29</b> | oval      | yeast | <i>Candida haemuloni</i>    | B |    |    |
| 18 | E | C1 | 801.8  | male   | <i>Rachycentron canadum</i> | FFP | 26.6 | 29 | 0.17 | 1.2 | <b>C30</b> | round     | yeast | <i>Debaryomyces</i> sp.     | L |   |   |
| 19 | E | C2 | 1447.8 | male   | <i>Rachycentron canadum</i> | FFP | 26.6 | 29 | 0.21 | 2.2 | <b>C31</b> | round big | yeast | <i>Candida parapsilosis</i> | F |  |  |



|    |   |    |        |        |                             |     |      |    |      |     |            |           |       |                             |   |                                                                                       |                                                                                       |
|----|---|----|--------|--------|-----------------------------|-----|------|----|------|-----|------------|-----------|-------|-----------------------------|---|---------------------------------------------------------------------------------------|---------------------------------------------------------------------------------------|
| 20 | E | C6 | 1271.2 | female | <i>Rachycentron canadum</i> | FFP | 26.6 | 29 | 0.32 | 6.2 | <b>C32</b> | round big | yeast | <i>Candida parapsilosis</i> | G |    |    |
| 21 | E | C1 | 801.8  | male   | <i>Rachycentron canadum</i> | FFP | 26.6 | 29 | 0.17 | 1.2 | <b>C33</b> | round     | yeast | <i>Candida haemuloni</i>    | D |    |    |
| 22 | E | C6 | 1271.2 | female | <i>Rachycentron canadum</i> | FFP | 26.6 | 29 | 0.32 | 6.2 | <b>C36</b> | round big | yeast | <i>Candida parapsilosis</i> | H |    |    |
| 23 | E | C1 | 801.8  | male   | <i>Rachycentron canadum</i> | FFP | 26.6 | 29 | 0.17 | 1.2 | <b>C37</b> | oval      | yeast | <i>Candida haemuloni</i>    | B |   |   |
| 24 | E | C1 | 801.8  | male   | <i>Rachycentron canadum</i> | FFP | 26.6 | 29 | 0.17 | 1.2 | <b>C38</b> | round     | yeast | <i>Debaryomyces</i> sp.     | L |  |  |

|    |   |     |       |     |                             |     |    |    |      |    |            |       |       |                          |   |                                                                                       |                                                                                       |
|----|---|-----|-------|-----|-----------------------------|-----|----|----|------|----|------------|-------|-------|--------------------------|---|---------------------------------------------------------------------------------------|---------------------------------------------------------------------------------------|
| 25 | C | C20 | 511.2 | IND | <i>Rachycentron canadum</i> | FFP | 27 | 35 | 0.55 | 20 | <b>C40</b> | round | yeast | <i>Debaryomyces</i> sp.  | J | 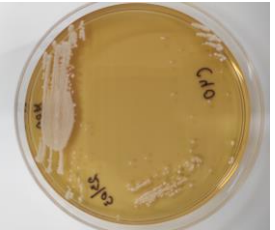   |    |
| 26 | C | C20 | 511.2 | IND | <i>Rachycentron canadum</i> | FFP | 27 | 35 | 0.55 | 20 | <b>C41</b> | round | yeast | <i>Debaryomyces</i> sp.  | L |    |    |
| 27 | C | C27 | 366.8 | IND | <i>Rachycentron canadum</i> | FF  | 27 | 35 | 0.73 | 27 | <b>C42</b> | oval  | yeast | <i>Candida haemuloni</i> | B |    |    |
| 28 | C | C25 | 410.4 | IND | <i>Rachycentron canadum</i> | FFP | 27 | 35 | 0.22 | 25 | <b>C43</b> | round | yeast | <i>Debaryomyces</i> sp.  | M |   |   |
| 29 | C | C23 | 498.6 | IND | <i>Rachycentron canadum</i> | FFP | 27 | 35 | 0.25 | 23 | <b>C44</b> | oval  | yeast | <i>Candida haemuloni</i> | B |  |  |

|    |   |     |        |        |                             |     |      |    |      |     |            |                     |       |                             |   |                                                                                       |                                                                                       |
|----|---|-----|--------|--------|-----------------------------|-----|------|----|------|-----|------------|---------------------|-------|-----------------------------|---|---------------------------------------------------------------------------------------|---------------------------------------------------------------------------------------|
| 30 | C | C23 | 498.6  | IND    | <i>Rachycentron canadum</i> | FFP | 27   | 35 | 0.25 | 23  | <b>C45</b> | round big           | yeast | <i>Candida haemuloni</i>    | A | 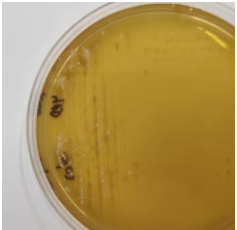   |    |
| 31 | E | C6  | 1271.2 | female | <i>Rachycentron canadum</i> | FFP | 26.6 | 29 | 0.32 | 6.2 | <b>C46</b> | oval + pseudohyphae | yeast | <i>Candida parapsilosis</i> | E |    |    |
| 32 | E | C4  | 1410.2 | female | <i>Rachycentron canadum</i> | FFP | 26.6 | 29 | 0.4  | 4.2 | <b>C47</b> | round big           | yeast | <i>Candida haemuloni</i>    | A |    |    |
| 33 | C | C30 | 327.6  | IND    | <i>Rachycentron canadum</i> | FF  | 27   | 35 | 0.31 | 30  | <b>C49</b> | round               | yeast | <i>Debaryomyces</i> sp.     | K |   |   |
| 34 | E | C6  | 1271.2 | female | <i>Rachycentron canadum</i> | FFP | 26.6 | 29 | 0.32 | 6.2 | <b>C50</b> | round               | yeast | <i>Candida parapsilosis</i> | E |  |  |

|    |   |     |        |        |                             |     |      |    |      |     |            |           |       |                         |   |                                                                                       |                                                                                       |
|----|---|-----|--------|--------|-----------------------------|-----|------|----|------|-----|------------|-----------|-------|-------------------------|---|---------------------------------------------------------------------------------------|---------------------------------------------------------------------------------------|
| 35 | C | C27 | 366.8  | IND    | <i>Rachycentron canadum</i> | FF  | 27   | 35 | 0.73 | 27  | <b>C60</b> | round     | yeast | <i>Debaryomyces</i> sp. | M |    |    |
| 36 | E | C1  | 801.8  | male   | <i>Rachycentron canadum</i> | FFP | 26.6 | 29 | 0.17 | 1.2 | <b>C61</b> | round big | yeast | <i>Naganishia</i> sp.   | P |    |    |
| 37 | E | C3  | 1087.6 | female | <i>Rachycentron canadum</i> | FFP | 26.6 | 29 | 0.24 | 3.2 | <b>C62</b> | round     | yeast | <i>Debaryomyces</i> sp. | K |    |    |
| 38 | C | C25 | 410.4  | IND    | <i>Rachycentron canadum</i> | FFP | 27   | 35 | 0.22 | 25  | <b>C65</b> | round     | yeast | <i>Debaryomyces</i> sp. | M |   |   |
| 39 | E | C1  | 801.8  | male   | <i>Rachycentron canadum</i> | FFP | 26.6 | 29 | 0.17 | 1.2 | <b>C67</b> | round     | yeast | <i>Debaryomyces</i> sp. | O |  |  |

|      |     |                    |
|------|-----|--------------------|
| Feed | FF  | formulated feed    |
|      | FFP | frozen fish pieces |

|        |   |           |
|--------|---|-----------|
| Origin | C | CENAIM    |
|        | E | Emagrocom |
