# Supplementary material for: Selection of Autochthonous Yeasts Isolated from the Intestinal Tracts of Cobia Fish (Rachycentron canadum) with Probiotic Potential
Source: MDPI journal article supplement (doi:10.3390/jof9020274), 2023-02-18
Supplement: s1 [file s1]

Table S2. Results of the second selection step of yeast strains.

| N° | Yeast strains | Biomass Production<br>(dry weight) | Biofilm<br>production | Hidrophobicity<br>Xylene | Hidrophobicity<br>Ethyl Acetate | Hidrophobicity<br>Chloroform | Auto-<br>aggregation 1<br>hour | Auto-<br>aggregation 24<br>hours |
|----|---------------|------------------------------------|-----------------------|--------------------------|---------------------------------|------------------------------|--------------------------------|----------------------------------|
|    |               | g/L                                | Absorbance            | %                        | %                               | %                            | %                              | %                                |
| 1  | <b>Ch-C01</b> | <b>2.00 ± 0.07</b>                 | <b>0.91 ± 0.12</b>    | <b>30.68 ± 0.54</b>      | <b>25.61 ± 2.26</b>             | <b>92.15 ± 0.50</b>          | <b>1.90 ± 0.002</b>            | <b>81.35 ± 0.006</b>             |
| 2  | <b>Ch-C27</b> | <b>1.72 ± 0.01</b>                 | <b>1.00 ± 0.21</b>    | <b>45.22 ± 1.88</b>      | <b>18.98 ± 4.08</b>             | <b>88.64 ± 2.48</b>          | <b>13.85 ± 0.002</b>           | <b>85.55 ± 0.011</b>             |
| 3  | Ch-C47        | 0.69 ± 0.13                        | 0.63 ± 0.01           | 53.16 ± 2.60             | 21.81 ± 3.57                    | 74.53 ± 2.68                 | 22.05 ± 0.002                  | 84.60 ± 0.007                    |
| 4  | <b>Cp-C31</b> | <b>1.50 ± 0.04</b>                 | <b>1.44 ± 0.02</b>    | <b>55.05 ± 1.32</b>      | <b>49.46 ± 2.57</b>             | <b>90.57 ± 0.93</b>          | <b>21.75 ± 0.004</b>           | <b>87.50 ± 0.006</b>             |
| 5  | <b>Cp-C32</b> | <b>1.36 ± 0.07</b>                 | <b>1.37 ± 0.07</b>    | <b>72.77 ± 4.71</b>      | <b>44.66 ± 0.48</b>             | <b>94.39 ± 0.66</b>          | <b>5.05 ± 0.003</b>            | <b>89.70 ± 0.003</b>             |
| 6  | Cp-C33        | 0.83 ± 0.09                        | 0.83 ± 0.03           | 72.25 ± 1.28             | 40.49 ± 5.09                    | 93.21 ± 0.65                 | 25.70 ± 0.004                  | 82.35 ± 0.006                    |
| 7  | Cp-C36        | 1.59 ± 0.04                        | 1.49 ± 0.07           | 16.24 ± 4.09             | 44.27 ± 1.54                    | 92.85 ± 0.77                 | 20.70 ± 0.003                  | 87.55 ± 0.012                    |
| 8  | <b>Cp-C46</b> | <b>1.57 ± 0.02</b>                 | <b>1.35 ± 0.03</b>    | <b>18.56 ± 3.81</b>      | <b>49.41 ± 2.19</b>             | <b>93.50 ± 0.29</b>          | <b>48.15 ± 0.003</b>           | <b>87.85 ± 0.006</b>             |
| 9  | Dh-C03        | 1.00 ± 0.15                        | 0.26 ± 0.03           | 43.48 ± 3.82             | 60.26 ± 4.63                    | 88.45 ± 2.26                 | 17.30 ± 0.002                  | 92.15 ± 0.007                    |
| 10 | <b>Dh-C10</b> | <b>1.02 ± 0.08</b>                 | <b>0.13 ± 0.02</b>    | <b>41.47 ± 3.57</b>      | <b>59.76 ± 1.27</b>             | <b>85.25 ± 1.75</b>          | <b>27.65 ± 0.001</b>           | <b>89.85 ± 0.005</b>             |
| 11 | Dh-C17        | 0.89 ± 0.04                        | 0.14 ± 0.01           | 31.40 ± 2.08             | 36.96 ± 2.96                    | 92.72 ± 1.06                 | 14.00 ± 0.006                  | 84.05 ± 0.006                    |
| 12 | <b>Dh-C28</b> | <b>1.05 ± 0.06</b>                 | <b>0.14 ± 0.02</b>    | <b>43.52 ± 1.56</b>      | <b>36.07 ± 2.31</b>             | <b>90.94 ± 0.90</b>          | <b>6.90 ± 0.001</b>            | <b>85.30 ± 0.001</b>             |
| 13 | Dh-C40        | 0.93 ± 0.09                        | 0.69 ± 0.03           | 78.20 ± 2.21             | 35.16 ± 0.93                    | 88.96 ± 0.22                 | 31.00 ± 0.006                  | 87.20 ± 0.003                    |
| 14 | Dsp-C26       | 0.87 ± 0.06                        | 0.12 ± 0.00           | 57.59 ± 1.01             | 34.85 ± 5.10                    | 82.24 ± 3.60                 | 10.80 ± 0.002                  | 84.70 ± 0.008                    |
| 15 | Dsp-C67       | 0.30 ± 0.07                        | 0.85 ± 0.03           | 77.68 ± 0.78             | 50.38 ± 2.65                    | 93.40 ± 0.19                 | 10.70 ± 0.003                  | 80.25 ± 0.003                    |
| 16 | Nsp-C61       | 0.66 ± 0.02                        | 0.12 ± 0.00           | 57.62 ± 2.80             | 33.99 ± 3.31                    | 90.54 ± 0.12                 | 37.40 ± 0.003                  | 78.00 ± 0.006                    |

data: mean ± standar error

data in bold correspond to the 7 selected yeasts.
