# Supplementary material for: Selection of Autochthonous Yeasts Isolated from the Intestinal Tracts of Cobia Fish (Rachycentron canadum) with Probiotic Potential
Source: MDPI journal article supplement (doi:10.3390/jof9020274), 2023-02-18
Supplement: s1 [file s1]

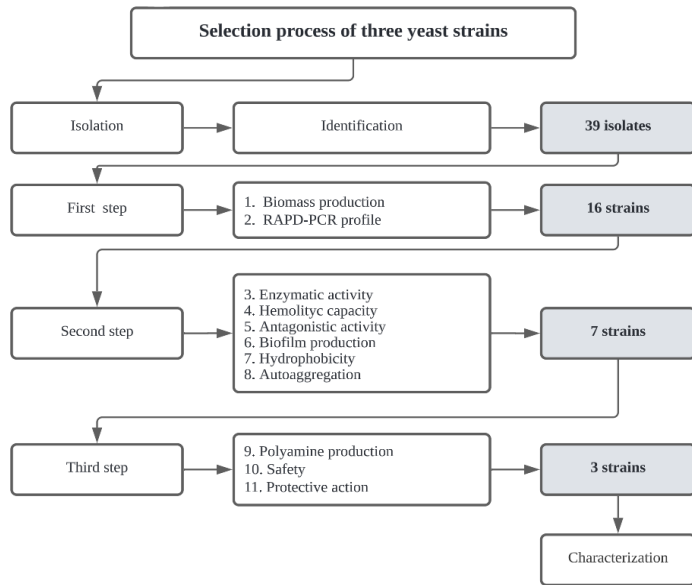

**Figure 1.** Flow chart showing the selection process performed to identify yeast strains with probiotic potential.
