# Supplementary material for: Selection of Autochthonous Yeasts Isolated from the Intestinal Tracts of Cobia Fish (Rachycentron canadum) with Probiotic Potential
Source: MDPI journal article supplement (doi:10.3390/jof9020274), 2023-02-18
Supplement: s1 [file s1]

**Table S3. Polyamine quantification in the cell pellets and supernatants of the 7 yeast strains.**

|    |               |             | Spermidine     |     | Spermine       |     | Total polyamines |     |
|----|---------------|-------------|----------------|-----|----------------|-----|------------------|-----|
| N° | Yeast strains | Origin      | mean ± se      | HSD | mean ± se      | HSD | mean ± se        | HSD |
| 1  | Ch-C1         | Cell pellet | 120.96 ± 16.27 | ab  | 136.69 ± 11.20 |     | 257.65 ± 27.46   |     |
| 2  | Ch-C27        | Cell pellet | 100.33 ± 10.75 | b   | 138.89 ± 17.42 |     | 239.22 ± 28.16   |     |
| 3  | Cp-C31        | Cell pellet | 217.79 ± 24.73 | a   | 175.91 ± 11.44 |     | 393.70 ± 36.14   |     |
| 4  | Cp-C32        | Cell pellet | 209.19 ± 26.91 | a   | 172.91 ± 23.83 |     | 382.11 ± 50.44   |     |
| 5  | Cp-C46        | Cell pellet | 191.57 ± 27.21 | ab  | 149.80 ± 19.56 |     | 341.38 ± 45.50   |     |
| 6  | Dh-C10        | Cell pellet | 147.43 ± 16.80 | ab  | 184.88 ± 7.81  |     | 332.31 ± 24.52   |     |
| 7  | Dh-C28        | Cell pellet | 203.69 ± 11.93 | a   | 195.54 ± 7.46  |     | 399.23 ± 19.26   |     |
| 1  | Ch-C1         | Supernatant | 13.74 ± 0.87   | bc  | 84.22 ± 3.45   | ab  | 97.96 ± 4.21     | ab  |
| 2  | Ch-C27        | Supernatant | 15.97 ± 2.25   | abc | 94.51 ± 12.89  | ab  | 110.48 ± 15.03   | ab  |
| 3  | Cp-C31        | Supernatant | 13.11 ± 1.05   | bc  | 103.26 ± 7.49  | ab  | 116.38 ± 8.54    | ab  |
| 4  | Cp-C32        | Supernatant | 12.98 ± 1.62   | bc  | 88.68 ± 11.05  | ab  | 101.66 ± 12.61   | ab  |
| 5  | Cp-C46        | Supernatant | 11.92 ± 1.16   | c   | 84.67 ± 11.43  | b   | 96.59 ± 12.58    | b   |
| 6  | Dh-C10        | Supernatant | 27.00 ± 2.49   | a   | 165.55 ± 5.31  | a   | 192.55 ± 7.44    | a   |
| 7  | Dh-C28        | Supernatant | 20.70 ± 0.70   | ab  | 160.11 ± 5.20  | a   | 180.81 ± 5.88    | a   |

**data:** mean ± standar error

**HSD:** Honestly-significant-difference Tukey
